# Supplementary material for: Accelerated Aging Effect on Mechanical Properties of Common 3D-Printing Polymers
Source: MDPI journal article supplement (doi:10.3390/polym13234132), 2021-11-26
Supplement: s1 [file s1]

Article

# Accelerated Aging Effect on Mechanical Properties of Common 3D-Printing Polymers

Catalin Gheorghe Amza <sup>1,\*</sup>, Aurelian Zapciu<sup>2</sup>, Florin Baci<sup>3</sup>, Mihai Ion Vasile<sup>3</sup> and Adrian Ionut Nicoara<sup>4</sup>

<sup>1</sup> Department of Quality Engineering and Industrial Technologies, Faculty of Industrial Engineering and Robotics, University “Politehnica” of Bucharest, 060042 Bucharest, Romania; acata1@camis.pub.ro

<sup>2</sup> Department of Robotics and Production Systems, Faculty of Industrial Engineering and Robotics, University “Politehnica” of Bucharest, 060042 Bucharest, Romania; aurelianzapciu@yahoo.com

<sup>3</sup> Department of Strength Materials, Faculty of Industrial Engineering and Robotics, University “Politehnica” of Bucharest, 060042 Bucharest, Romania; florin.baci@upb.ro (F.B.); vasileionmihai@yahoo.com (M.I.V.);

<sup>4</sup> Department of Science and Engineering of Oxide Materials and Nanomaterials, Faculty of Applied Chemistry and Materials Science, University “Politehnica” of Bucharest, 060042 Bucharest, Romania; adrian.nicoara@upb.ro

\* Correspondence: acata1@camis.pub.ro or amza\_catalin@yahoo.com; Tel.: +40-744-500-803

## Supplementary Materials

**Citation:** Amza, C.G.; Zapciu, A.; Baci, F.; Vasile, M.I.; Nicoara, A.I. Ultraviolet Lamp Accelerated Aging Effect on Mechanical Properties of Common 3D-Printing Polymers. *Polymers* **2021**, *13*, 4132. <https://doi.org/10.3390/polym13234132>

Academic Editor: Giovanni Gómez-Gras

Received: 1 November 2021

Accepted: 23 November 2021

Published: 26 November 2021

**Publisher’s Note:** MDPI stays neutral with regard to jurisdictional claims in published maps and institutional affiliations.

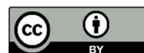

**Copyright:** © 2021 by the authors. Licensee MDPI, Basel, Switzerland. This article is an open access article distributed under the terms and conditions of the Creative Commons Attribution (CC BY) license (<http://creativecommons.org/licenses/by/4.0/>).

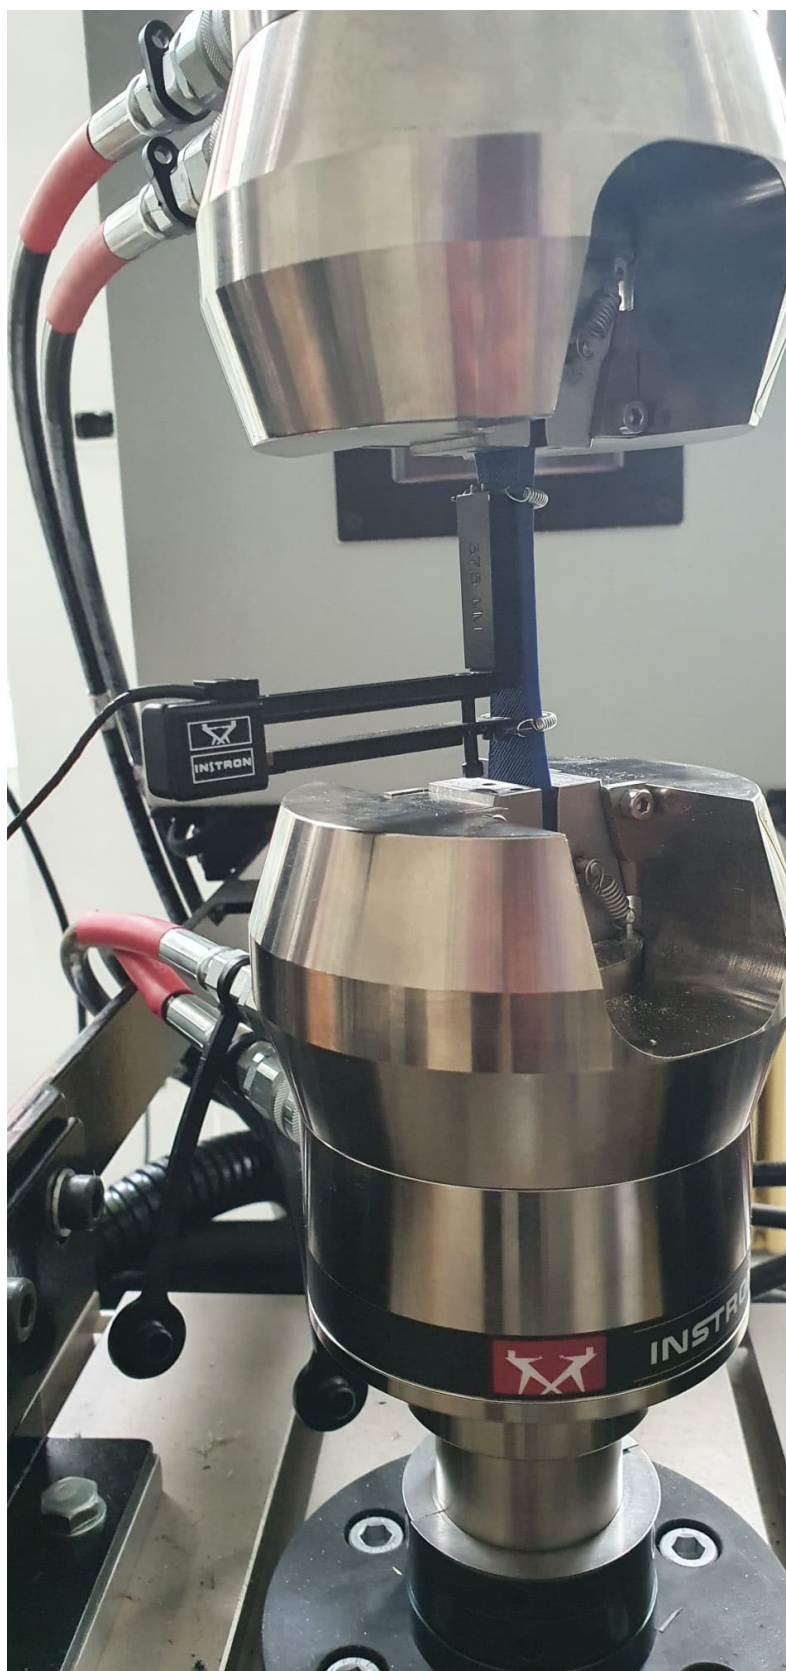

Figure S1. 3D-printed part (dogbone) during tensile strength testing on Instron 8872 machine.

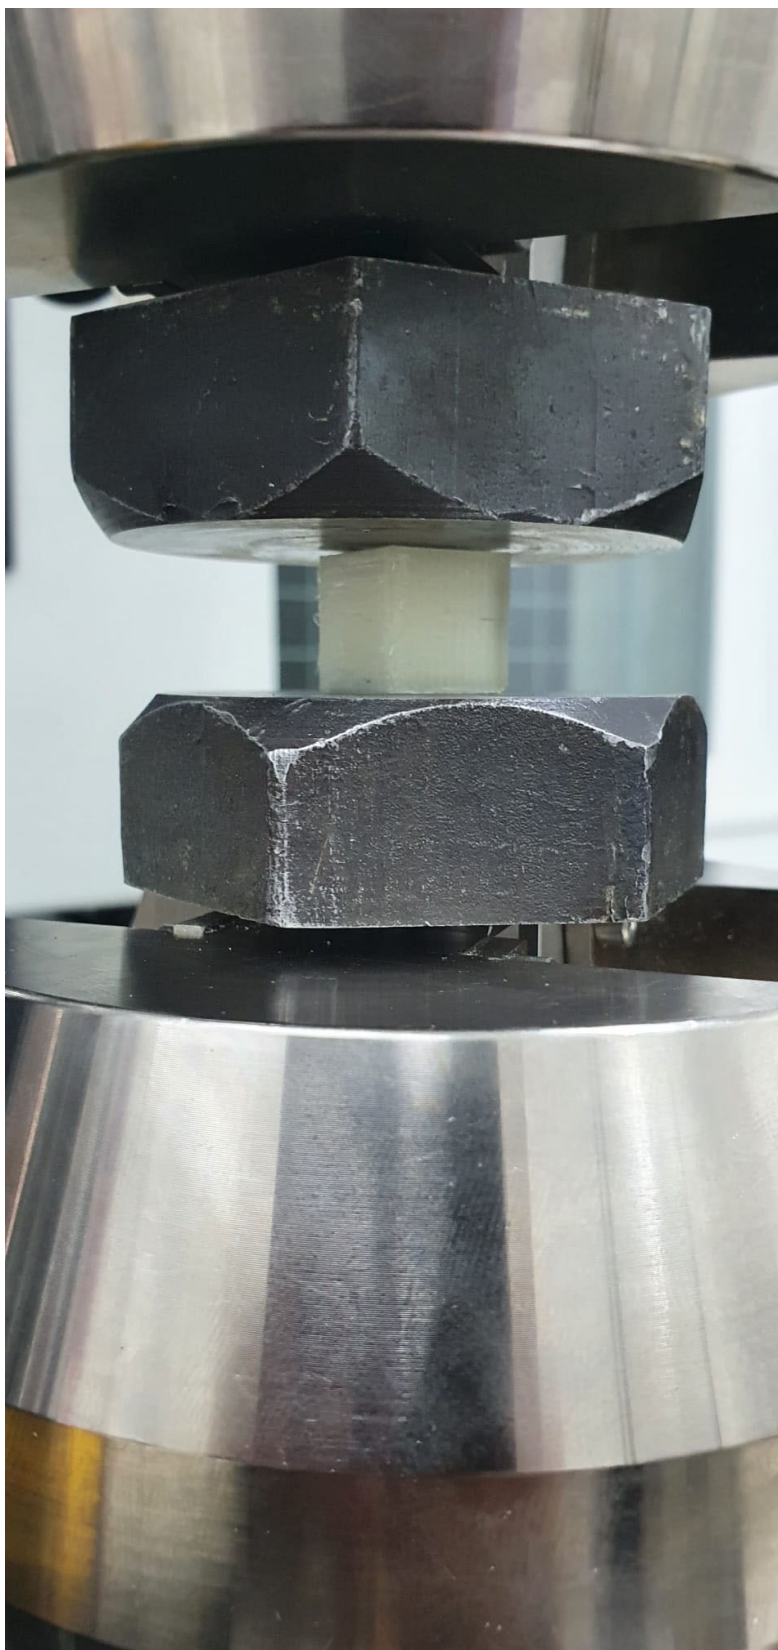

**Figure S2.** 3D-printed part (cubic) during compressive strength testing on Instron 8801 machine.



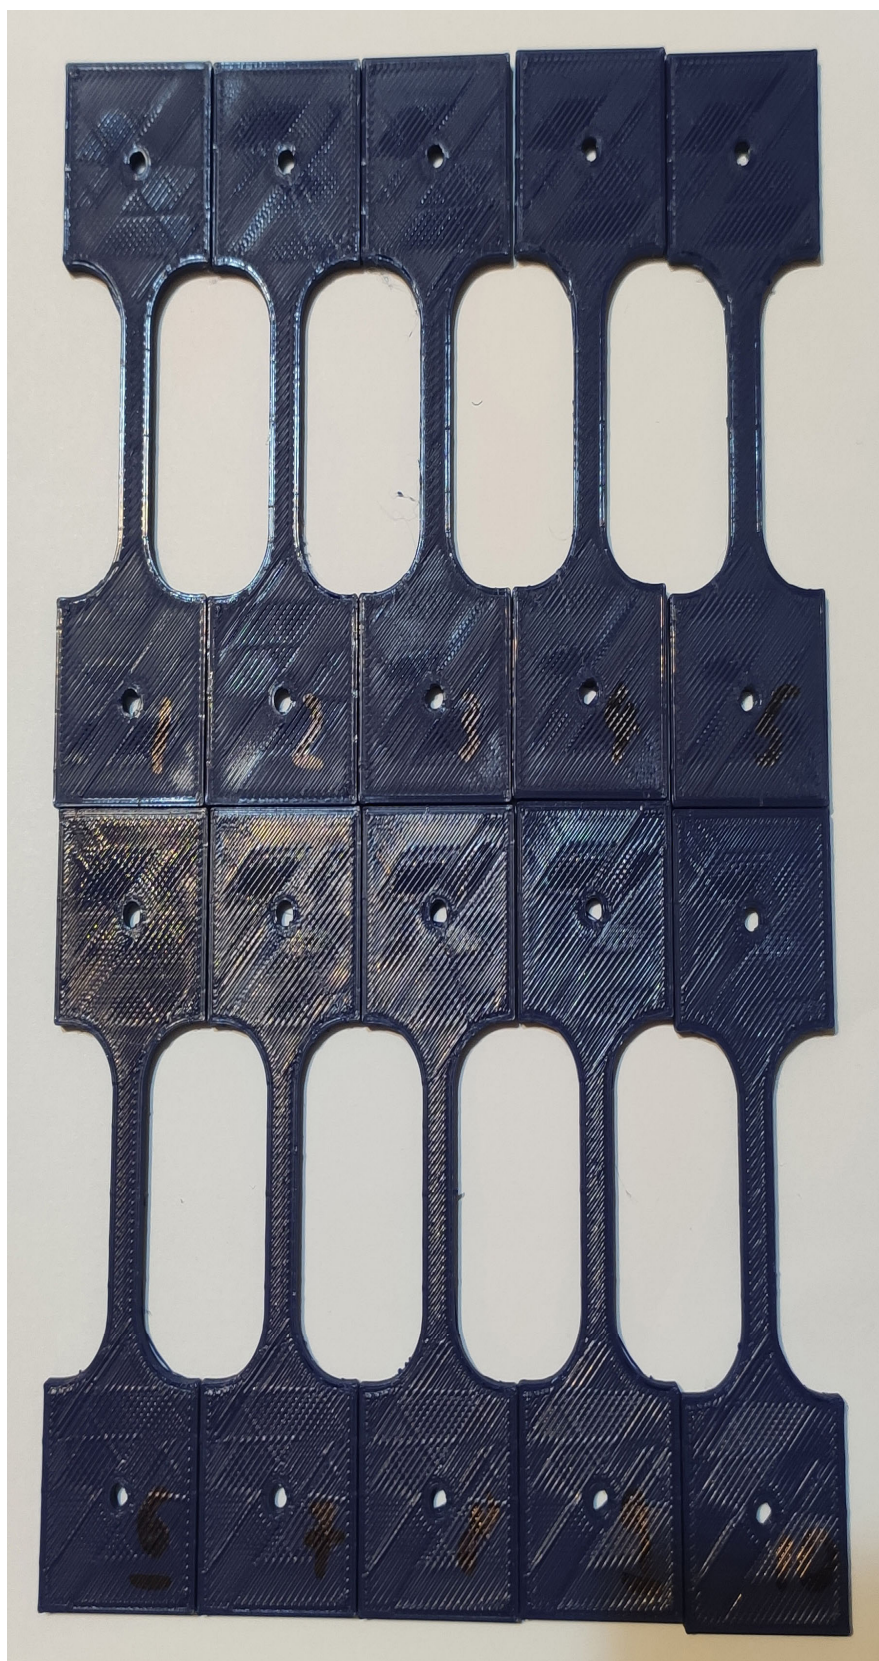

Figure S3. 3D-printed parts for tensile creep testing, from PLA.

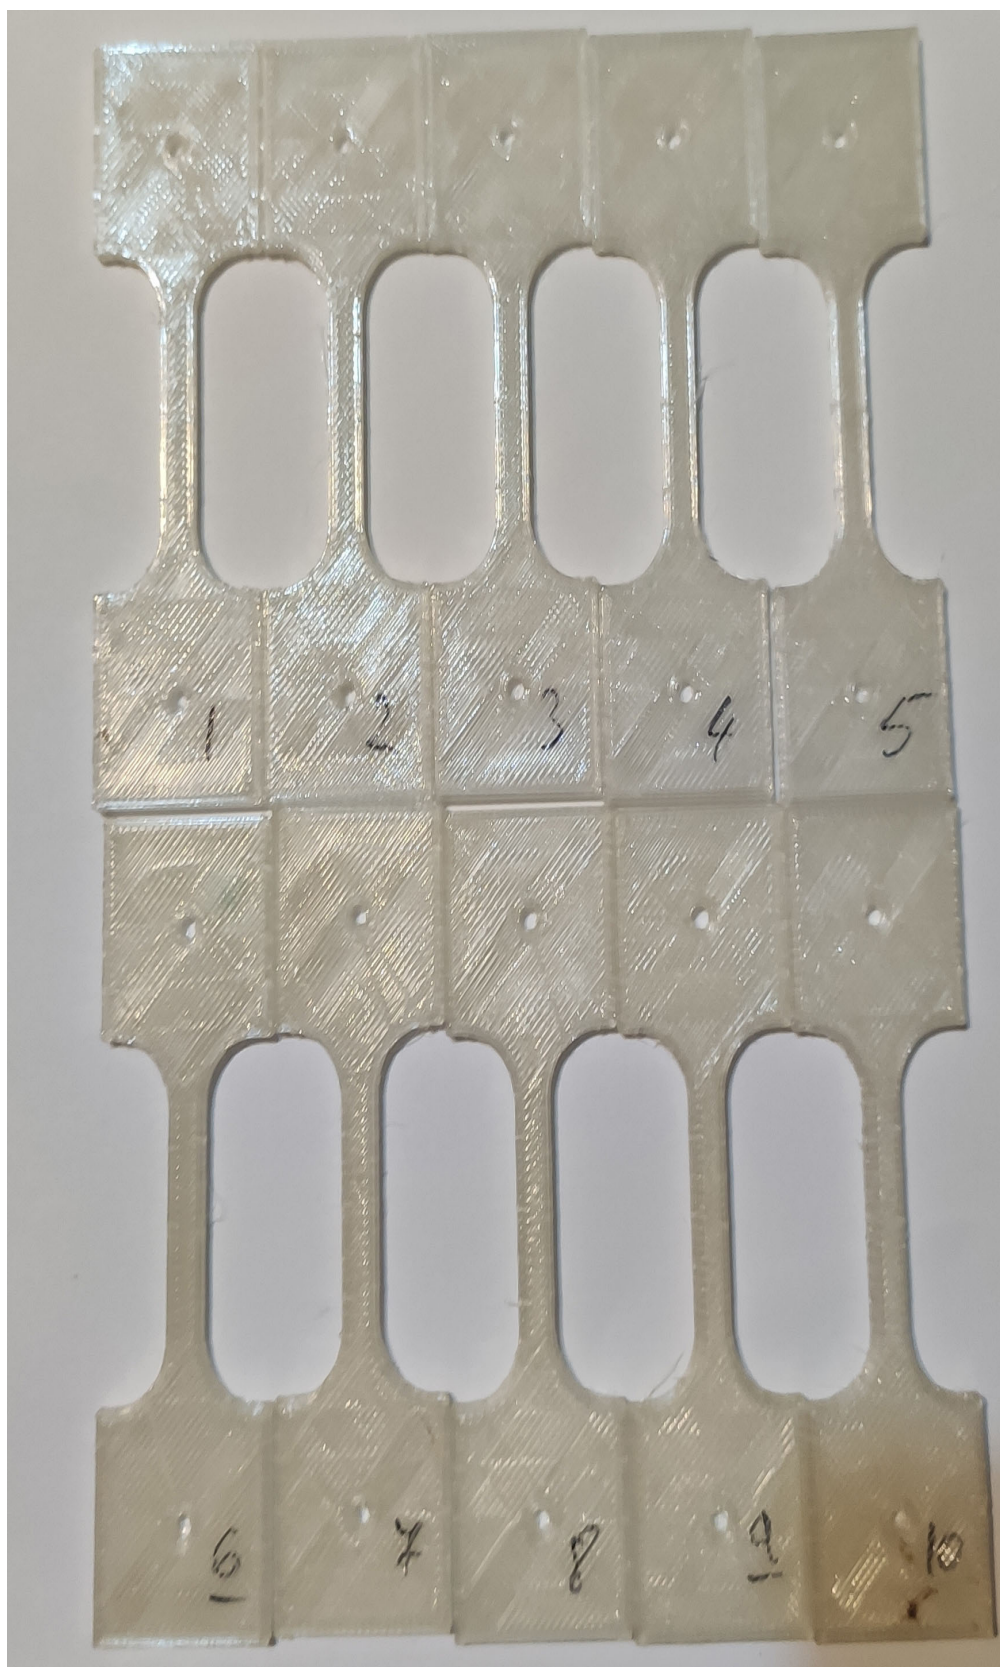

Figure S4. 3D-printed parts for tensile creep testing, from PETG.



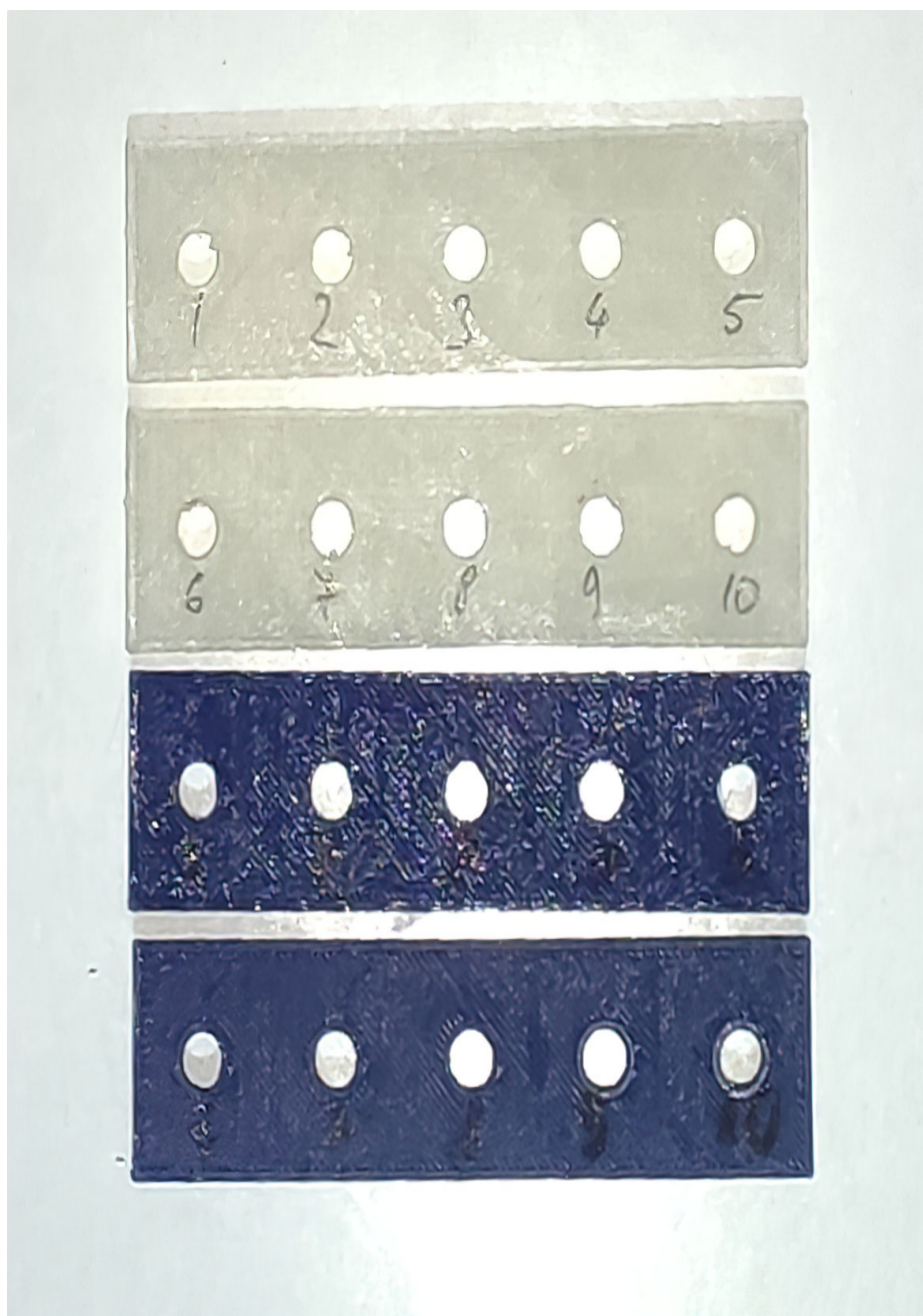

**Figure S5.** 3D-printed parts for practical compressive creep test, from PLA (blue) and PETG (transparent, white).

**Table S1.** Dimensional measurements.

|                       | Tensile strength |         | Compression strength |          |          | Creep (tensile) |         | Creep (compress) |         |
|-----------------------|------------------|---------|----------------------|----------|----------|-----------------|---------|------------------|---------|
|                       | Width            | Height  | X                    | Y        | Z        | Width           | Height  | Y                | Z       |
| <b>Nominal [mm]</b>   | 13.00            | 4.00    | 15.00                | 15.00    | 15.00    | 5.20            | 3.00    | 25.20            | 8.00    |
| <b>PLA Control</b>    | 13.292 ±         | 4.016 ± | 15.602 ±             | 15.316 ± | 15.018 ± | 5.204 ±         | 3.000 ± | 25.188 ±         | 8.076 ± |
| <b>[mm]</b>           | 0.015            | 0.009   | 0.022                | 0.011    | 0.009    | 0.006           | 0.004   | 0.006            | 0.013   |
| <b>PLA UV-B [mm]</b>  | 13.268 ±         | 4.010 ± | 15.588 ±             | 15.324 ± | 15.034 ± | 5.212 ±         | 3.004 ± | 25.196 ±         | 8.092 ± |
|                       | 0.030            | 0.010   | 0.029                | 0.007    | 0.010    | 0.005           | 0.005   | 0.007            | 0.017   |
| <b>PETG Control</b>   | 13.336 ±         | 4.020 ± | 15.648 ±             | 15.428 ± | 15.016 ± | 5.210 ±         | 3.014 ± | 25.280 ±         | 7.604 ± |
| <b>[mm]</b>           | 0.014            | 0.005   | 0.020                | 0.010    | 0.005    | 0.008           | 0.005   | 0.012            | 0.004   |
| <b>PETG UV-B [mm]</b> | 13.360 ±         | 4.016 ± | 15.770 ±             | 15.446 ± | 15.020 ± | 5.210 ±         | 3.012 ± | 25.300 ±         | 7.604 ± |
|                       | 0.014            | 0.005   | 0.046                | 0.013    | 0.010    | 0.004           | 0.006   | 0.013            | 0.005   |
